# Supplementary material for: Cargo selective vesicle tethering: The structural basis for binding of specific cargo proteins by the Golgi tether component TBC1D23
Source: PubMed Central journal article supplement (PMC11093223; doi:10.1126/sciadv.adl0608), 2024-03-29
Supplement: sciadv.adl0608_sm.pdf [file sciadv.adl0608_sm.pdf]

Supplementary Materials for  
**Cargo selective vesicle tethering: The structural basis for binding of specific cargo proteins by the Golgi tether component TBC1D23**

Jérôme Cattin-Ortolá *et al.*

Corresponding author: David J. Owen, [djo@30cam.ac.uk](mailto:djo@30cam.ac.uk); Sean Munro, [sean@mrc-lmb.cam.ac.uk](mailto:sean@mrc-lmb.cam.ac.uk)

*Sci. Adv.* **10**, eadl0608 (2024)  
DOI: 10.1126/sciadv.adl0608

**The PDF file includes:**

Figs. S1 to S5  
Tables S1 and S2  
Legends for data S1 to S3

**Other Supplementary Material for this manuscript includes the following:**

Data S1 to S3

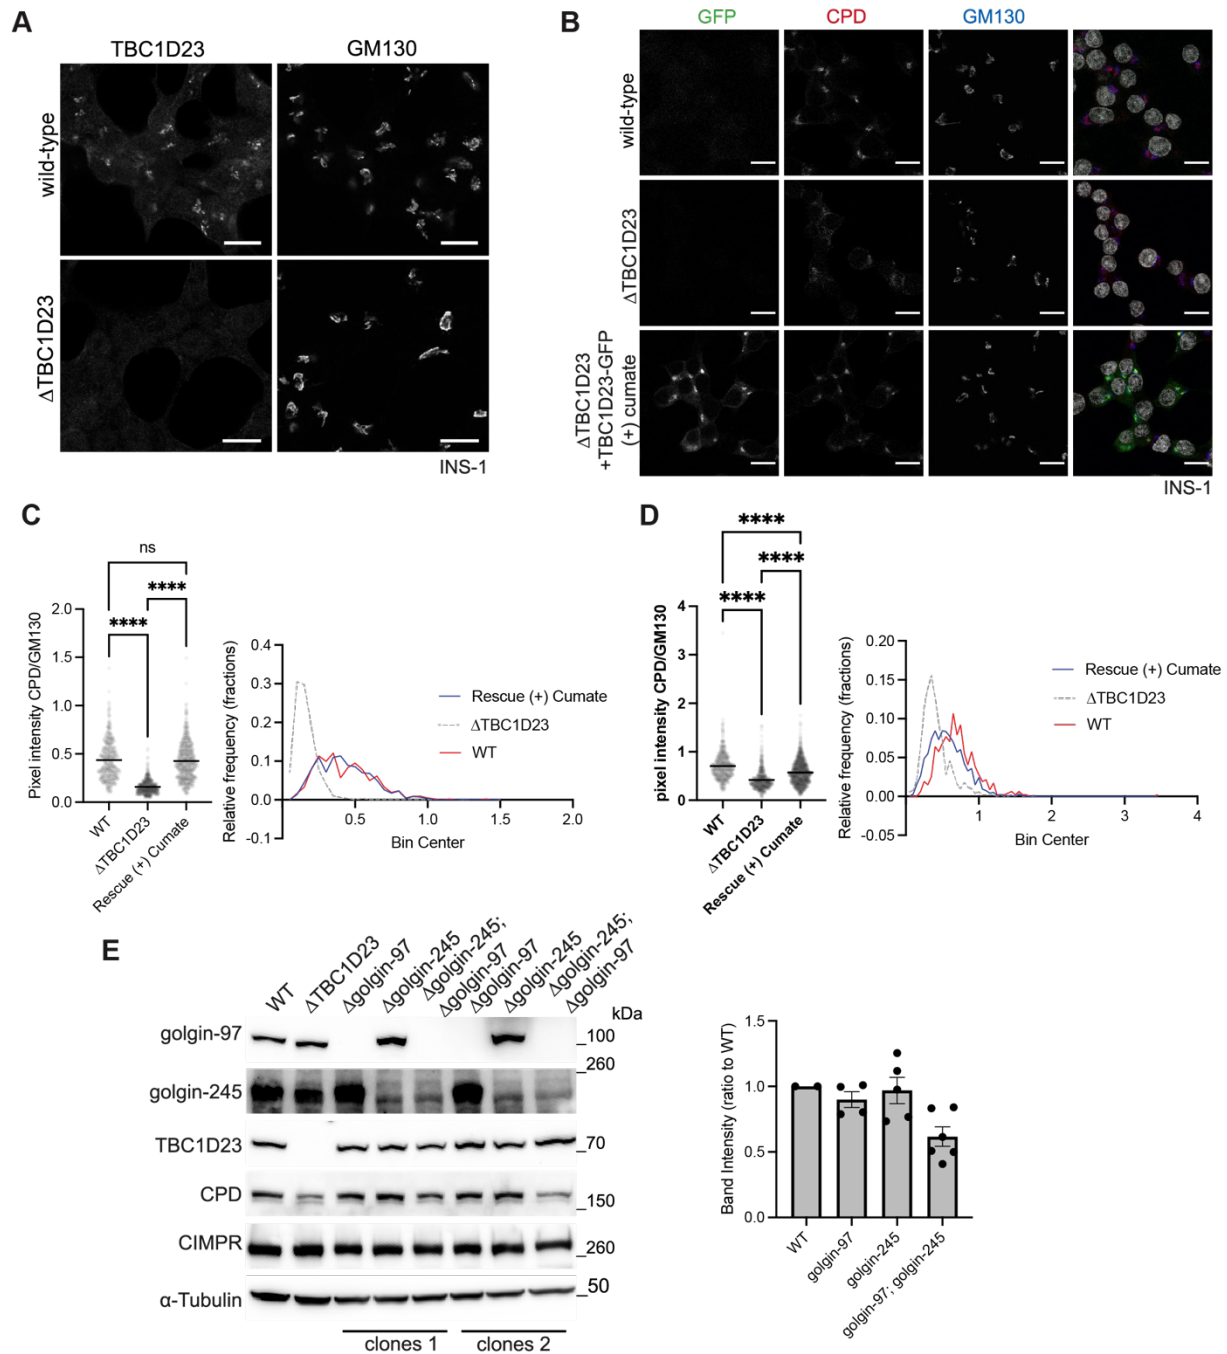

**Fig. S1. Normal CPD trafficking requires TBC1D23.**

(A) Confocal micrographs of wild-type and  $\Delta TBC1D23$  INS-1 cells, labelled for endogenous TBC1D23 and GM130 (Golgi). Scale bar: 10  $\mu\text{m}$ . Representative of three repeats. (B) Confocal micrographs of the indicated INS-1 cell lines, labelled for GFP-booster and endogenous CPD and GM130 (Golgi). Scale bar: 10  $\mu\text{m}$ . Representative of three repeats. (C) Scatter plot showing the ratio of the Golgi-area fluorescence intensity of CPD over GM130 for cells as in (B). Golgi-area were detected automatically using an ImageJ macro. The black bar is mean, and for wild

type (WT), n = 422 cells; for  $\Delta TBC1D23$ , n=521; for rescue, n=573. Statistics: ordinary one-way ANOVA followed by a Sidak's multiple comparison tests with a single pooled variance. \*\*\*\*:  $P < 0.0001$ , ns: not significant. Also shown are the ratios plotted as frequency distributions with a bin width of 0.05. Source data in data S2. **(D)** An independent biological repeat of the experiment shown in (C). For wild type (WT), n = 468; for  $\Delta TBC1D23$ , n = 501; for rescue, n = 946. Source data in data S2. **(E)** Immunoblot analysis of detergent lysates from HEK-293 (WT),  $\Delta TBC1D23$ , two clones of  $\Delta golgin-97$ , three clones of  $\Delta golgin-245$ , and four clones of  $\Delta golgin-97; \Delta golgin-245$  (one or two replicates for each). On the right is a representative immunoblot, and all data summarised in the plot on the left. Total protein concentration was measured so equal amounts of protein were loaded in each lane with band intensity quantification of the CPD blot normalised to wild type for each blot. Multiple clones were tested to demonstrate reproducibility rather than pool the observations. Source data in data S2.

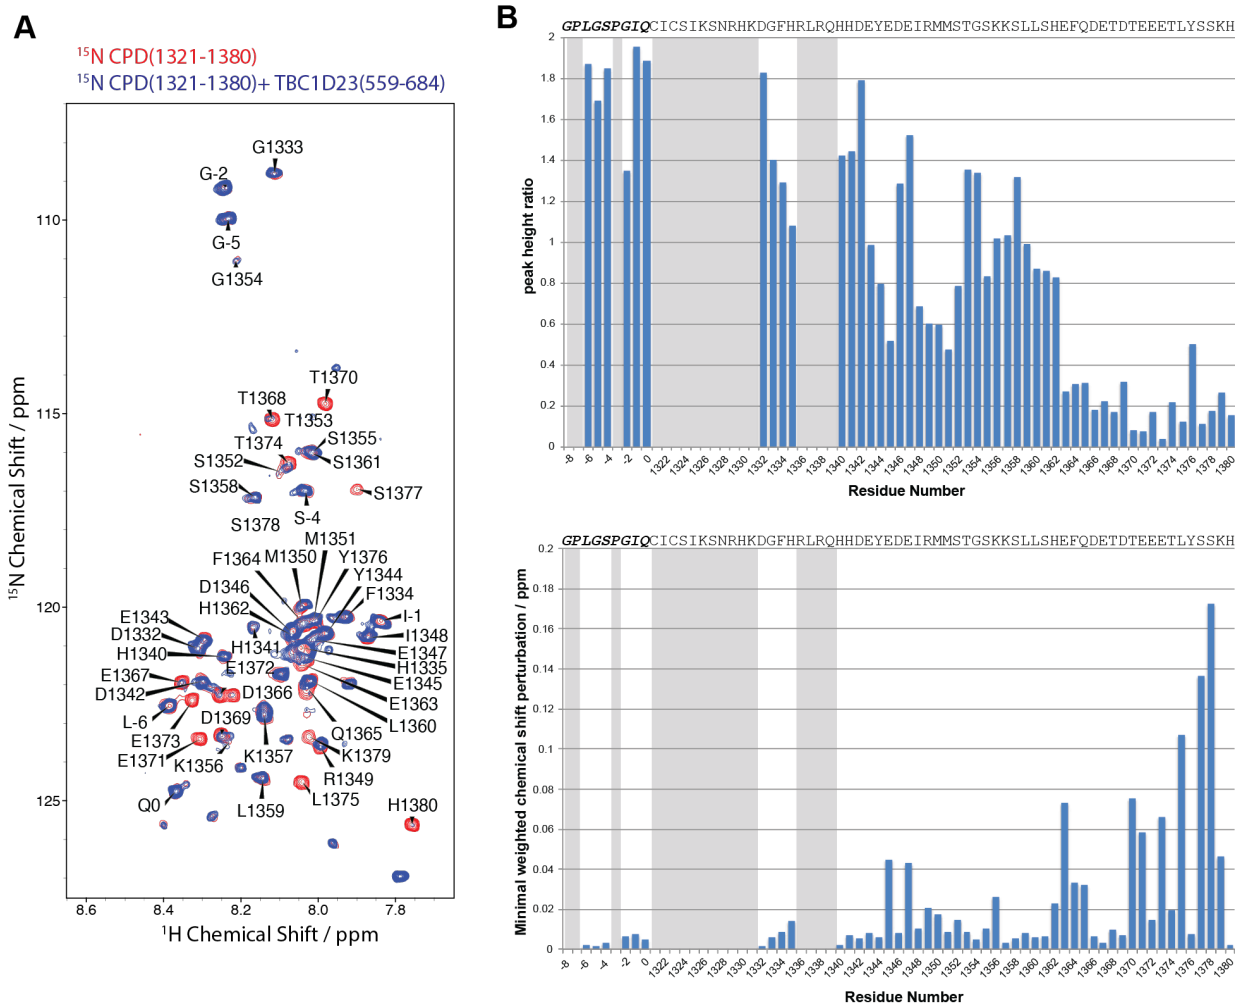

**Fig. S2. NMR analysis of CPD cytoplasmic tail in presence of TBC1D23 C-terminal domain.**

(A) The assigned  $^1\text{H}$ - $^{15}\text{N}$  BEST-TROSY of  $^{15}\text{N}$  labelled CPD (residues 1321-1380) is shown in red overlaid with the BEST-TROSY of  $^{15}\text{N}$  CPD with unlabelled TBC1D23 (residues 559-684) at a 1:1 ratio shown in blue. Both spectra were collected at 278 K and 600 MHz. (B) Peak height intensity differences of the  $^{15}\text{N}$  CPD peaks in the presence and absence of unlabelled TBC1D23 are reported as a ratio (top panel). The minimal chemical shift perturbations seen for  $^{15}\text{N}$  CPD in the presence and absence of unlabelled TBC1D23 (bottom panel). Grey areas indicate missing assignments.

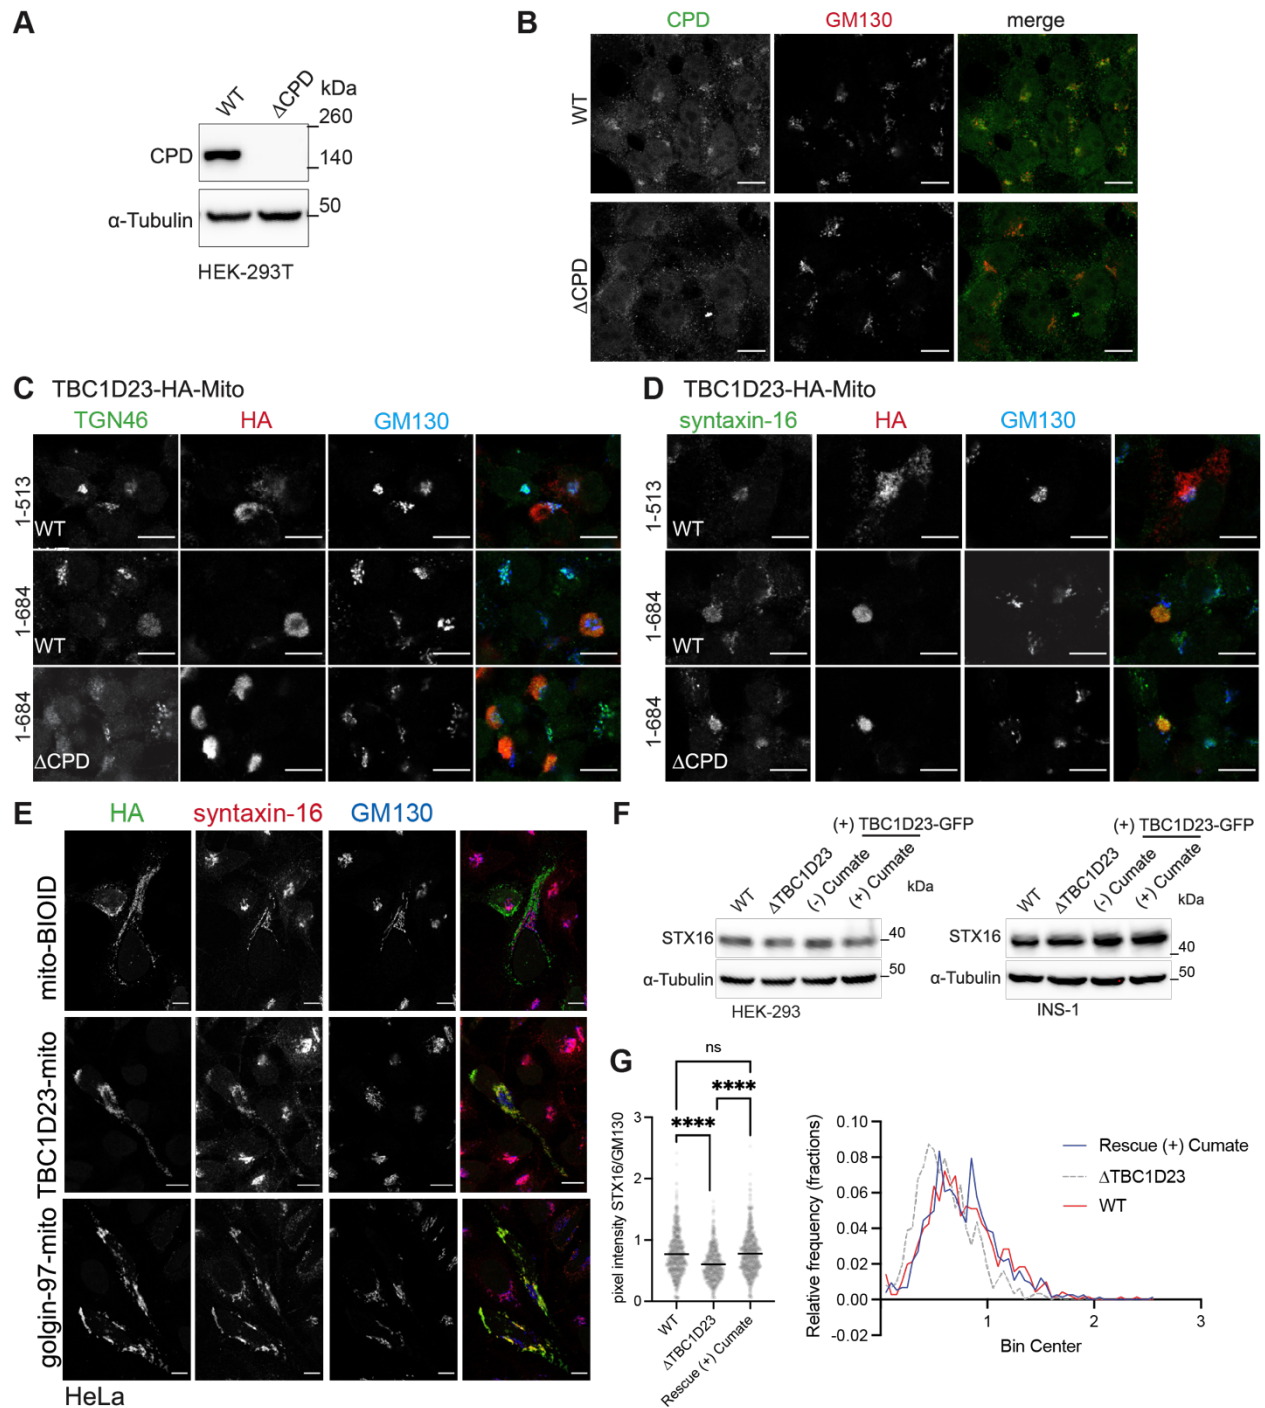

**Fig. S3. CPD is not required for TBC1D23 to capture vesicles.**

(A) Immunoblots of detergent lysates from 293T wild type (WT) and  $\Delta$ CPD. Cells were lysed with Triton-X-100. Total protein concentration was measured so equal amount of protein was loaded in each lane. (bottom) band intensity quantification of the CPD blot normalised to WT for each blot. (B) Confocal micrographs of wild type (WT) and  $\Delta$ CPD 293T cells. Cells were fixed, permeabilised and stained using endogenous CPD and GM130 (Golgi marker). Scale bar: 10  $\mu$ m.

Representative of two repeats. (C) Confocal micrographs of HeLa cells TBC1D23-mito chimaeras and labelled for the HA tag in the chimaera, endogenous TGN46 and GM130. Scale bar: 10  $\mu$ m. Representative of two repeats. (D) Confocal micrographs of HeLa cells TBC1D23-mito chimaeras and labelled for the HA tag in the chimaera, endogenous syntaxin-16 and GM130. Scale bar: 10  $\mu$ m. Representative of two repeats. (E) Confocal micrographs of HeLa cells expressing golgin-97-mito or TBC1D23-mito chimaeras and labelled for the HA tag in the chimaera and endogenous syntaxin-16 and GM130. Mito-BioID was used as a negative control. Scale bar: 10  $\mu$ m. (F) Immunoblots of detergent lysates from HEK-293 or INS-1 cells as indicated. WT,  $\Delta$ TBC1D23, or rescue  $\Delta$ TBC1D23 cells stably expressing TBC1D23-GFP under a cumate promoter with the cells incubated in the absence (-) and in presence (+) of cumate for 24-36 hours. These are the samples as in Fig. 2A, but here are blotted for syntaxin-16. (G) As Fig. 3I: independent biological repeat for syntaxin-16 Golgi localisation. For WT, n = 705; for  $\Delta$ TBC1D23, n = 619; for the stable rescues, n = 743. Source data for fig. S3G are in data S2.

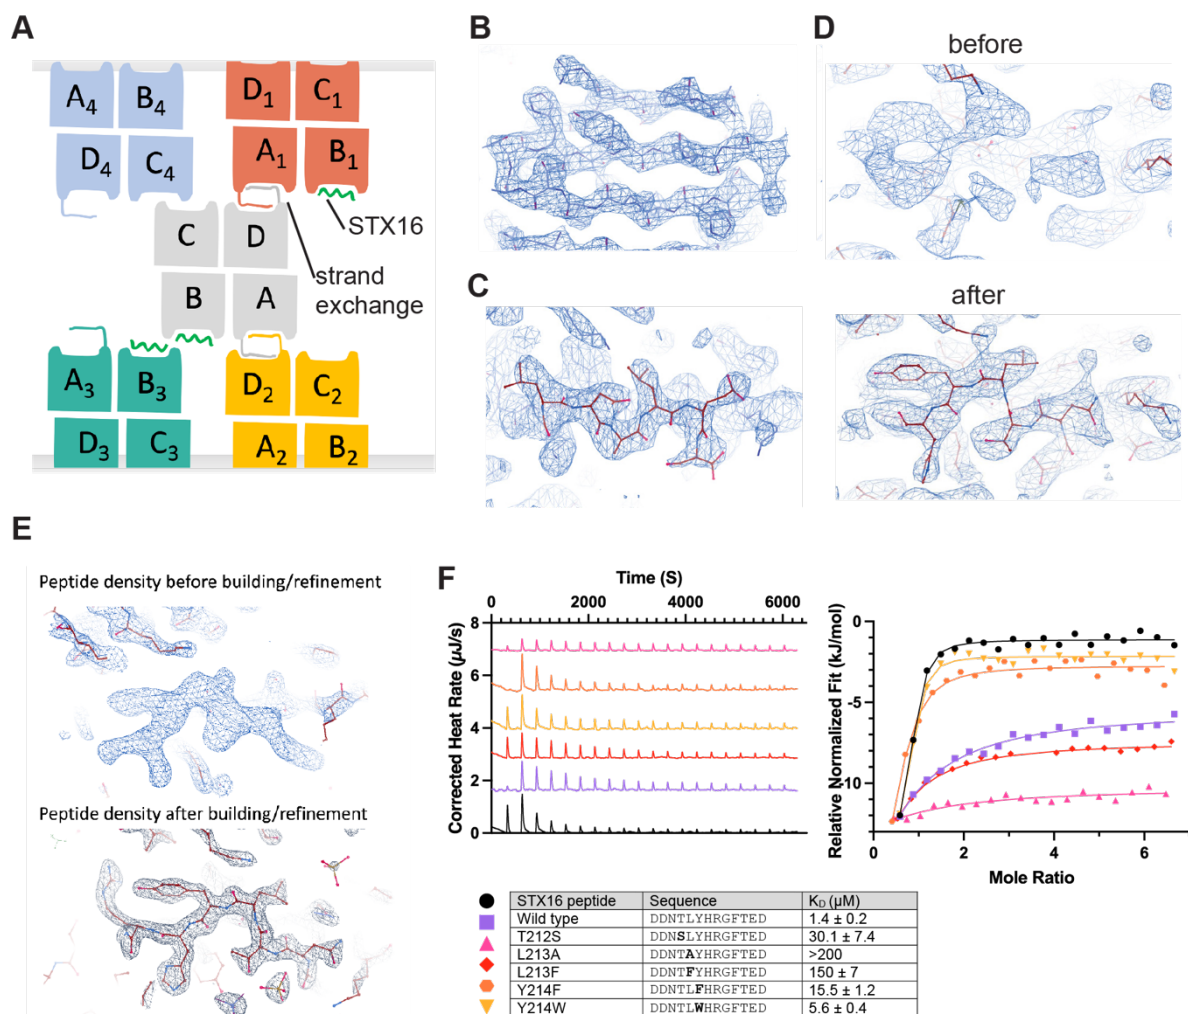

**Fig. S4. Structural and biochemical characterisation of the interaction between the TBC1D23 C-terminal domain and the syntaxin-16 peptide.**

(A) Cartoon of the crystal packing of the four copies of the TBC1D23 C-terminal domain showing the C-terminal strand exchange that occurs for copies A and D, with the syntaxin-16 peptide bound to copy B, and the occupancy of copy C unclear. (B) Representative electron density of full-length TBC1D23 C-terminal domain contoured at  $2\sigma$ . (C) Electron density of TBC1D23 full length tail (..MKVLDALLES) blocking the syntaxin-16 binding site, as seen for copies A and D in (A). (D) Electron density of the syntaxin-16 peptide bound to the TBC1D23 full length C-terminal domain (copy B in (A)), shown before and after building and refinement. (E) Density map showing the initial experimental density (blue) obtained with MR for the C-terminal lacking the last eight residues domain with syntaxin-16 peptide bound, and the final 2Fo-Fc electron density (black) with syntaxin-16 peptide built in. (F) ITC of relative binding of mutated forms of the syntaxin-16 peptide to the TBC1D23 C-terminal domain. Affinity calculated from three repeats – see data S2.



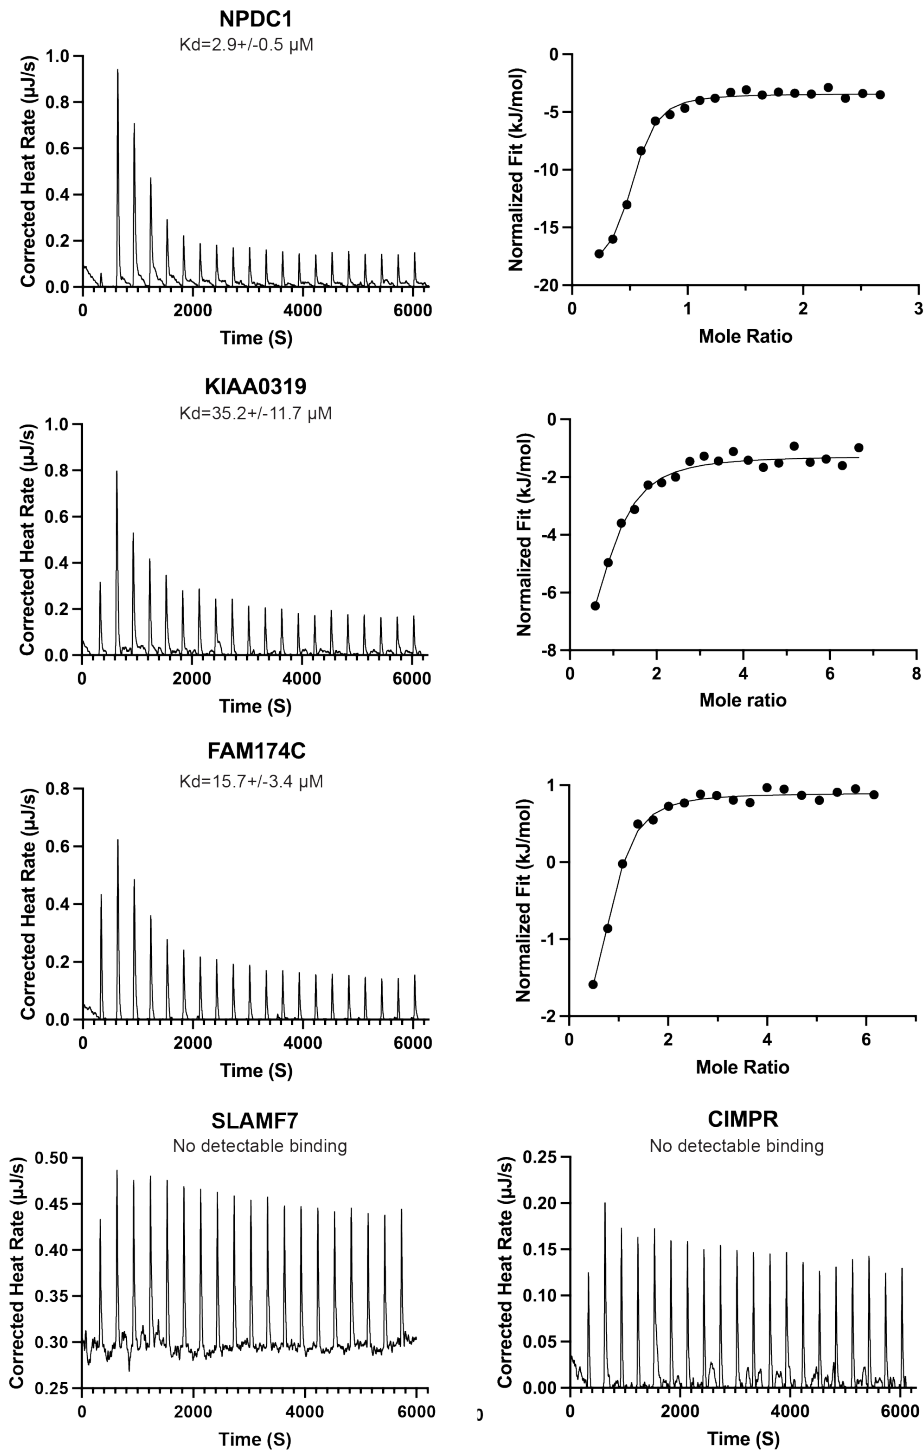

**Fig. S5. Binding of peptides containing the acidic TLY motif from several proteins that recycle between endosomes and Golgi.**

ITC of the binding to the TBC1D23 C-terminal domain of peptides corresponding to TLY-motif containing regions from the cytoplasmic tails of the indicated proteins. Affinity calculated from three repeats – see data S2.



|                                      | <b>Mouse TBC1D23<br/>(559-684)</b> | <b>Mouse TBC1D23<br/>(559-677) with<br/>human STX16 (206-<br/>221)</b> |
|--------------------------------------|------------------------------------|------------------------------------------------------------------------|
| PDB accession                        |                                    | 8QQF                                                                   |
| Space group                          | P 62 2 2                           | P 65 2 2                                                               |
| Resolution range                     | 194.38-3.17                        | 116.19-2.19                                                            |
| InnerShell                           | 112.394-11.533                     | 116.19-8.280                                                           |
| OuterShell                           | 3.814-3.172                        | 2.479-2.187                                                            |
| Rmerge (all I+ & I-)                 | 0.939 (2.988)                      | 0.133 (2.607)                                                          |
| Rmerge (within I+ & I-)              | 0.989 (2.998)                      | 0.141 (2.710)                                                          |
| Rmeas (all I+ & I-)                  | 0.951 (3.028)                      | 0.136 (2.651)                                                          |
| Rmeas (within I+ & I-)               | 1.013 (3.073)                      | 0.145 (2.791)                                                          |
| Rpim (all I+ & I-)                   | 0.151 (0.485)                      | 0.024 (0.472)                                                          |
| Rpim (within I+ & I-)                | 0.220 (0.667)                      | 0.034 (0.668)                                                          |
| Number of observations               | 352792 (17313)                     | 486437 (23072)                                                         |
| Number of unique observations        | 9118 (457)                         | 14895 (745)                                                            |
| $\langle I \rangle / \text{sd}(I)$   | 7.5 (1.9)                          | 23.0 (1.9)                                                             |
| CC(1/2)                              | 0.972 (0.627)                      | 0.999 (0.707)                                                          |
| Completeness % (spherical)           | 90.8 (47.7)                        | 43.2 (7.0)                                                             |
| Completeness % (ellipsoidal)         | 90.8 (47.7)                        | 94.8 (82.9)                                                            |
| Multiplicity                         | 38.7 (37.9)                        | 32.7 (31.0)                                                            |
| RMS bond lengths (Å)                 | 0.0063                             | 0.0077                                                                 |
| RMS bond angles (°)                  | 1.644                              | 1.605                                                                  |
| Reflections (All/Free)               | 8038 / 356                         | 14895/752                                                              |
| Rfactor/Rfree                        | 0.209 / 0.274                      | 0.186 / 0.259                                                          |
| Ramachandran (%) (favoured/outliers) | 97.11/2.89                         | 99.24/0.76                                                             |

**Table S1. Crystallographic data collection and refinement statistics.**

| UniProt ID                                                    | Gene     | motif      | motif_pos | terminus | tmds | tmd_topo<br>_N;C | adj_tmd_pos |
|---------------------------------------------------------------|----------|------------|-----------|----------|------|------------------|-------------|
| O00264                                                        | PGRMC1   | KEGEEPTVY  | 172-180   | C-term   | 1    | oi               | 25-43       |
| Q9BVV8                                                        | FAM174C  | LDSDEETVF  | 118-126   | C-term   | 1    | oi               | 73-93       |
| Q3ZCQ3                                                        | FAM174B  | DEDEDSTVF  | 146-154   | C-term   | 1    | oi               | 91-111      |
| Q8TBP5                                                        | FAM174A  | DEDDNTLF   | 175-183   | C-term   | 1    | oi               | 124-144     |
| Q9NQX5                                                        | NPDC1    | NEDGDFTVY  | 280-288   | C-term   | 1    | oi               | 182-202     |
| Q01344                                                        | IL5RA    | VETLEDSVF  | 412-420   | C-term   | 1    | oi               | 343-362     |
| Q5VV43                                                        | KIAA0319 | FSDSDQDTIF | 1033-1041 | C-term   | 1    | oi               | 956-976     |
| O75051                                                        | PLXNA2   | VDDLFFETLF | 1692-1700 | C-term   | 1    | oi               | 1238-1258   |
| O75976                                                        | CPD      | TDTEEETLY  | 1368-1376 | C-term   | 1    | oi               | 1300-1320   |
| O14662                                                        | STX16    | DDGDDNTLY  | 206-214   | N-term   | 1    | io               | 302-322     |
| Q68D42                                                        | TMEM215  | CPEPESDIF  | 189-197   | C-term   | 2    | io;oi            | 40-60       |
| Q96ET8                                                        | TVP23C   | DDTEDVSLF  | 8-16      | N-term   | 2    | io;oi            | 52-72       |
| Q9NYZ1                                                        | TVP23B   | DDTEDVSLF  | 8-16      | N-term   | 4    | io;oi            | 34-53       |
| Q8NFJ5                                                        | GPRC5A   | FEETGDTLY  | 309-317   | C-term   | 7    | oi;oi            | 248-268     |
| Q96FM1                                                        | PGAP3    | SFLEDDSLY  | 300-308   | C-term   | 7    | oi;oi            | 280-299     |
| Q86SP6                                                        | GPR149   | YDDDENSIF  | 418-426   | C-term   | 7    | oi;oi            | 343-363     |
| Q9NUN5                                                        | LMBRD1   | ISDDEPSVY  | 530-538   | C-term   | 9    | oi;oi            | 487-507     |
| Q96RN1                                                        | SLC26A8  | KEEEIFSLF  | 586-594   | C-term   | 12   | io;oi            | 498-518     |
| Q96QE2                                                        | SLC2A13  | KLEEIESLF  | 601-609   | C-term   | 12   | io;oi            | 574-594     |
|                                                               |          |            |           |          |      |                  |             |
| BioPlex 3.0 hits with TBC1D23 contain four membrane proteins: |          |            |           |          |      |                  |             |
| NPDC1                                                         |          |            |           |          |      |                  |             |
| FAM174A                                                       |          |            |           |          |      |                  |             |
| NIPAL1                                                        |          |            |           |          |      |                  |             |
| HS2ST1                                                        |          |            |           |          |      |                  |             |
|                                                               |          |            |           |          |      |                  |             |

**Table S2. Acidic TLY motif containing membrane proteins.**

Human membrane proteins with the motif [DE]<sub>>=3/5</sub>[TS][LIV][YFW] in a cytoplasmic domain. Also shown are the four membrane proteins reported to interact with TBC1D23 in the BioPlex protein interaction screen.

**Data S1. (separate file)**

The mass spectrometry data plotted in Figs. 1, B and C; and Fig. 3D.

**Data S2. (separate file)**

Source data for plots shown in Fig. 2, B, E and F; Fig. 3I; fig. S1, C to E; and fig. S3G; and for ITC measurements shown in Fig. 4A, Fig. 5C, Fig. 6B, fig. S4F, and fig. S5.

**Data S3. (separate file)**

Antibodies, plasmids and cell lines used in this study.
